# Supplementary material for: Comparing thaw probing, electrical resistivity tomography, and airborne lidar to quantify lateral and vertical thaw in rapidly degrading boreal permafrost
Source: Copernicus journal article supplement (doi:10.5194/egusphere-2024-3997), 2025-01-23
Supplement: Supplementary file 1 [file egusphere-2024-3997-supplement.pdf]

## Supplemental Information

650

Supplemental Table 1. Thaw extent (m<sup>2</sup>) and volumetric settlement loss (m<sup>3</sup>) due to lateral and vertical thaw derived from repeat lidar DEMs for a 300 m by 500 m buffered area around each transect.

| Transect |          | Percent | Extent | Volume |
|----------|----------|---------|--------|--------|
| T1       | Lateral  | 16.1    | 24097  | 1595   |
|          | Vertical | 37.2    | 55806  | 4381   |
| TF01     | Lateral  | 18.2    | 27297  | 2125   |
|          | Vertical | 29.7    | 44509  | 3447   |
| TF10     | Lateral  | 17.7    | 26555  | 5015   |
|          | Vertical | 46.1    | 69125  | 9755   |
| TF88     | Lateral  | 10.5    | 15732  | 374    |
|          | Vertical | 60.8    | 91206  | 3350   |
